# Supplementary material
Source: publisher site journal article supplement (https://www.dovepress.com/article/460058)
Supplement: Supplementary file 1 [file get_supplementary_file.php]

**SUPPLEMENTARY FILE**

Table S1 Search strategy via CINAHL. This shows all keywords utilised in search, including organisation and combination of keywords to formulate the final search.

| **Search strategy** |
| --- |
| #1- ((“child maltreatment”)  OR (“childhood maltreatment”)  OR (“childhood abuse”)  OR (“child abuse”)  OR (“child trauma”) OR  (“childhood trauma”) OR (“childhood trauma”) OR (“childhood adversity”)  OR (“child adversity”)  OR (“early stress”)  OR (“")  OR (“adverse childhood experience”) OR (“child experience”) OR (stressful life experience”) OR (“physical abuse”)  OR (“childhood physical abuse”) OR (“sexual abuse”) OR (“childhood sexual abuse”) OR (“childhood psychological abuse”) OR (“psychological abuse”) OR (“emotional abuse”) OR (“childhood emotional abuse”) OR (“childhood neglect”) OR (“physical neglect”) OR (“childhood physical neglect”) OR (“child physical abuse”)  OR (“child emotional neglect”) OR (“child psychological abuse”) OR  (“physical abuse”)  OR (“childhood sexual abuse”)) |
| #2- ((“metabolic syndrome”) OR (“metabolic syndrome X”) OR (“syndrome X”) OR (“insulin resistance syndrome”) OR (“insulin resistance”)) |
| #3- #1 AND #2 |

Table S2 Methodological qualities of cross-sectional studies

| Study | Define source of information | List of inclusion and exclusion criteria | Indicate time period | Subjects consecutive | Evaluators of subjective components | Quality assurance | Exclusion from analysis | Confounding control | Missing data | Completeness of data | Completeness of follow-up | Total score |
| --- | --- | --- | --- | --- | --- | --- | --- | --- | --- | --- | --- | --- |
| Midei *et al* 2013[64] | 1 | 1 | 1 | 1 | 1 | 1 | 1 | 1 | 1 | 0 | 1 | 10 |
| Lee *et al* 2014[63] | 1 | 1 | 1 | 1 | 1 | 1 | 1 | 1 | 1 | 1 | 1 | 11 |
| Willeman *et al* 2022[67] | 1 | 1 | 1 | 1 | 1 | 0 | 1 | 1 | 1 | 0 | 1 | 9 |

Table S3 Methodological qualities of prospective studies

| Included studies | Selection | | | | Comparability | Outcome | | | |
| --- | --- | --- | --- | --- | --- | --- | --- | --- | --- |
| Representativeness of exposed Cohort | Selection of the Non-Exposed Cohort | Ascertainment of Exposure | outcome of interest | Comparability of Cohorts | Assessment of Outcome | Follow-up duration | Adequacy of  Follow-up Cohorts | Quality  score |
| Li L *et al* 2019 [65] | 1 | 1 | 1 | 1 | 1 | 1 | 1 | 1 | 8 |
| Danese *et al* 2009[66] | 1 | 1 | 0 | 1 | 1 | 1 | 1 | 1 | 7 |
